# Supplementary material
Source: PubMed Central journal article supplement (PMC6495163)
Supplement: 10.1194_M090951_jlr.M090951-1.pdf [file 10.1194_M090951_jlr.M090951-1.pdf]

**supplemental Table S1:** Difference of PUFA level in optimal model of SNPs located in *ELOVL2* and *ELOVL5* gene

| SNP        | M/m      | Difference (95% CI)             |                                |                                |                                |                                |                                |                                |                                |
|------------|----------|---------------------------------|--------------------------------|--------------------------------|--------------------------------|--------------------------------|--------------------------------|--------------------------------|--------------------------------|
|            |          | LA                              | GLA                            | DGLA                           | AA                             | DTA                            | ALA                            | EPA                            | DHA                            |
| rs2281591  | A/G      | 0.00                            | 0.00                           | 0.00                           | 0.00                           | 0.00                           | 0.00                           | 0.00                           | 0.00                           |
|            |          | 0.05(-0.04-0.14) <sup>a</sup>   | 0.00(-0.00-0.01) <sup>b</sup>  | -0.01(-0.02-0.01) <sup>a</sup> | 0.01(-0.01-0.03) <sup>a</sup>  | 0.00(-0.00-0.01) <sup>a</sup>  | 0.00(-0.03-0.04) <sup>a</sup>  | -0.00(-0.00-0.00) <sup>a</sup> | -0.00(-0.01-0.01) <sup>b</sup> |
|            | <i>P</i> | 0.32                            | 0.68                           | 0.26                           | 0.19                           | 0.11                           | 0.9                            | 0.57                           | 0.56                           |
| rs12332786 | C/G      | 0.00                            | 0.00                           | 0.00                           | 0.00                           | 0.00                           | 0.00                           | 0.00                           | 0.00                           |
|            |          | -0.04(-0.12-0.04) <sup>a</sup>  | -0.00(-0.02-0.01) <sup>a</sup> | -0.00(-0.02-0.01) <sup>a</sup> | -0.00(-0.02-0.01) <sup>a</sup> | -0.00(-0.01-0.00) <sup>a</sup> | -0.01(-0.04-0.02) <sup>a</sup> | -0.00(-0.00-0.00) <sup>b</sup> | 0.00(-0.01-0.01) <sup>b</sup>  |
|            | <i>P</i> | 0.30                            | 0.39                           | 0.61                           | 0.63                           | 0.45                           | 0.52                           | 0.24                           | 0.30                           |
| rs3798713  | C/G      | 0.00                            | 0.00                           | 0.00                           | 0.00                           | 0.00                           | 0.00                           | 0.00                           | 0.00                           |
|            |          | -0.05(-0.09--0.01) <sup>b</sup> | -0.00(-0.01-0.00) <sup>b</sup> | -0.00(-0.01-0.00) <sup>b</sup> | -0.01(-0.02-0.00) <sup>b</sup> | -0.00(-0.00-0.00) <sup>b</sup> | -0.01(-0.03-0.00) <sup>b</sup> | -0.00(-0.00-0.00) <sup>b</sup> | 0.00(-0.01-0.01) <sup>b</sup>  |
|            | <i>P</i> | 0.019                           | 0.14                           | 0.36                           | 0.13                           | 0.12                           | 0.13                           | 0.18                           | 0.8                            |
| rs3778166  | G/A      | 0.00                            | 0.00                           | 0.00                           | 0.00                           | 0.00                           | 0.00                           | 0.00                           | 0.00                           |
|            |          | 0.03(-0.03-0.08) <sup>a</sup>   | 0.00(-0.00-0.01) <sup>b</sup>  | 0.00(-0.01-0.01) <sup>a</sup>  | 0.00(-0.01-0.01) <sup>a</sup>  | 0.00(-0.00-0.00) <sup>a</sup>  | 0.01(-0.02-0.03) <sup>a</sup>  | -0.00(-0.00-0.00) <sup>b</sup> | 0.00(-0.01-0.01) <sup>b</sup>  |
|            | <i>P</i> | 0.30                            | 0.48                           | 0.70                           | 0.97                           | 0.66                           | 0.60                           | 0.10                           | 0.71                           |
| rs9468304  | A/G      | 0.00                            | 0.00                           | 0.00                           | 0.00                           | 0.00                           | 0.00                           | 0.00                           | 0.00                           |
|            |          | 0.01(-0.03-0.05) <sup>b</sup>   | 0.00(-0.00-0.01) <sup>b</sup>  | 0.00(-0.00-0.01) <sup>b</sup>  | 0.00(-0.00-0.01) <sup>b</sup>  | 0.00(-0.00-0.00) <sup>b</sup>  | -0.01(-0.03-0.02) <sup>a</sup> | -0.00(-0.00-0.00) <sup>a</sup> | -0.00(-0.01-0.01) <sup>b</sup> |

|            |          |                                |                                 |                                 |                                |                                |                                |                               |                                |
|------------|----------|--------------------------------|---------------------------------|---------------------------------|--------------------------------|--------------------------------|--------------------------------|-------------------------------|--------------------------------|
|            | <i>P</i> | 0.54                           | 0.39                            | 0.63                            | 0.34                           | 0.46                           | 0.6                            | 0.67                          | 0.69                           |
| rs2294867  | C/A      | 0.00                           | 0.00                            | 0.00                            | 0.00                           | 0.00                           | 0.00                           | 0.00                          | 0.00                           |
|            |          | 0.01(-0.04-0.05) <sup>b</sup>  | 0.0(-0.00-0.01) <sup>b</sup>    | 0.01(-0.00-0.02) <sup>b</sup>   | 0.01(-0.00-0.02) <sup>a</sup>  | 0.00(-0.00-0.01) <sup>a</sup>  | 0.01(-0.01-0.03) <sup>a</sup>  | 0.00(0.00-0.00) <sup>a</sup>  | -0.00(-0.01-0.01) <sup>b</sup> |
|            | <i>P</i> | 0.81                           | 0.21                            | 0.11                            | 0.22                           | 0.083                          | 0.38                           | 0.036                         | 0.84                           |
| rs9357760  | A/G      | 0.00                           | 0.00                            | 0.00                            | 0.00                           | 0.00                           | 0.00                           | 0.00                          | 0.00                           |
|            |          | 0.03(-0.01-0.07) <sup>b</sup>  | 0.01(0.00-0.01) <sup>b</sup>    | 0.01(0.00-0.01) <sup>b</sup>    | 0.01(0.00-0.02) <sup>b</sup>   | 0.00(-0.00-0.00) <sup>b</sup>  | 0.01(-0.00-0.03) <sup>b</sup>  | 0.00(-0.00-0.00) <sup>a</sup> | 0.00(-0.01-0.01) <sup>b</sup>  |
|            | <i>P</i> | 0.088                          | 0.043                           | 0.013                           | 0.014                          | 0.009                          | 0.068                          | 0.46                          | 0.63                           |
| rs2397142  | C/G      | 0.00                           | 0.00                            | 0.00                            | 0.00                           | 0.00                           | 0.00                           | 0.00                          | 0.00                           |
|            |          | 0.03(-0.02-0.07) <sup>b</sup>  | 0.00(-0.00-0.01) <sup>b</sup>   | 0.01(0.00-0.01) <sup>b</sup>    | 0.01(-0.00-0.02) <sup>b</sup>  | 0.00(-0.00-0.00) <sup>b</sup>  | 0.01(-0.00-0.03) <sup>b</sup>  | 0.00(-0.00-0.00) <sup>b</sup> | -0.00(-0.02-0.01) <sup>b</sup> |
|            | <i>P</i> | 0.22                           | 0.11                            | 0.051                           | 0.058                          | 0.027                          | 0.15                           | 0.66                          | 0.67                           |
| rs209512   | A/G      | 0.00                           | 0.00                            | 0.00                            | 0.00                           | 0.00                           | 0.00                           | 0.00                          | 0.00                           |
|            |          | -0.03(-0.08-0.02) <sup>a</sup> | -0.01(-0.01--0.00) <sup>a</sup> | -0.01(-0.02--0.00) <sup>a</sup> | -0.01(-0.02-0.00) <sup>a</sup> | -0.00(-0.00-0.00) <sup>a</sup> | -0.01(-0.03-0.00) <sup>b</sup> | 0.00(-0.00-0.00) <sup>b</sup> | 0.00(-0.01-0.01) <sup>b</sup>  |
|            | <i>P</i> | 0.21                           | 0.042                           | 0.039                           | 0.20                           | 0.14                           | 0.15                           | 0.81                          | 0.51                           |
| rs12207094 | A/T      | 0.00                           | 0.00                            | 0.00                            | 0.00                           | 0.00                           | 0.00                           | 0.00                          | 0.00                           |
|            |          | 0.04(-0.01-0.09) <sup>b</sup>  | 0.01(0.00-0.01) <sup>b</sup>    | 0.01(-0.00-0.01) <sup>b</sup>   | 0.01(-0.01-0.02) <sup>b</sup>  | 0.00(-0.00-0.00) <sup>b</sup>  | 0.02(-0.00-0.04) <sup>b</sup>  | 0.00(-0.00-0.01) <sup>a</sup> | 0.02(-0.02-0.06) <sup>b</sup>  |
|            | <i>P</i> | 0.1                            | 0.029                           | 0.1                             | 0.31                           | 0.61                           | 0.11                           | 0.56                          | 0.31                           |

SNP, single nucleotide polymorphisms; *ELOVL2*, elongase gene 2 of the very long chain fatty acid; *ELOVL5*, elongase gene 5 of the very long chain fatty

acid. PUFA, long chain polyunsaturated fatty acids; LA, linoleic acid; GLA,  $\gamma$ -linolenic acid; DGLA, dihomo  $\gamma$ -linolenic acid; ARA, arachidonic acid; DTA, docosatetraenoic acid; ALA,  $\alpha$ -linolenic acid; EPA, eicosapentaenoic acid; DHA, docosahexaenoic acid; M, major allele; m, minor allele.

<sup>a</sup> Recessive model, it means PUFA changes of mm compared with MM+Mm.

<sup>b</sup> Dominant model, it means PUFA changes of Mm+mm compared with MM.
