# Supplementary material
Source: PubMed Central journal article supplement (PMC6495163)
Supplement: 10.1194_M090951_jlr.M090951-2.pdf [file 10.1194_M090951_jlr.M090951-2.pdf]

**supplemental Table S2:** Frequency of 3-SNP constructed haplotypes in *ELOVL2*

| Haplotype <sup>a</sup> | Allele    |            |           | hap.freq |
|------------------------|-----------|------------|-----------|----------|
|                        | rs2281591 | rs12332786 | rs3798713 |          |
| H <sub>1</sub>         | A         | C          | C         | 0.421    |
| H <sub>2</sub>         | A         | G          | G         | 0.249    |
| H <sub>3</sub>         | G         | C          | C         | 0.216    |
| H <sub>4</sub>         | A         | C          | G         | 0.107    |

*ELOVL2*, elongase gene 2 of the very long chain fatty acid.

<sup>a</sup> Haplotypes are named according to its frequency.
