# Supplementary material
Source: PubMed Central journal article supplement (PMC6495163)
Supplement: 10.1194_M090951_jlr.M090951-3.pdf [file 10.1194_M090951_jlr.M090951-3.pdf]

**supplemental Table S3:** Frequency of 5-SNP constructed haplotypes in *ELOVL5*

| Haplotype <sup>a</sup> | Allele    |           |           |          |            | hap.freq |
|------------------------|-----------|-----------|-----------|----------|------------|----------|
|                        | rs2294867 | rs9357760 | rs2397142 | rs209512 | rs12207094 |          |
| H <sub>1</sub>         | C         | A         | C         | G        | A          | 0.456    |
| H <sub>2</sub>         | A         | G         | G         | A        | A          | 0.315    |
| H <sub>3</sub>         | C         | A         | C         | A        | T          | 0.099    |
| H <sub>4</sub>         | A         | A         | C         | A        | A          | 0.059    |
| H <sub>5</sub>         | C         | A         | C         | A        | A          | 0.043    |

*ELOVL5*, elongase gene 5 of the very long chain fatty acid.

<sup>a</sup> Haplotypes are named according to its frequency.
