# Supplementary material
Source: PubMed Central journal article supplement (PMC6495163)
Supplement: 10.1194_M090951_jlr.M090951-4.pdf [file 10.1194_M090951_jlr.M090951-4.pdf]

**supplemental Table S4:** Interaction between *ELOVL2* haplotype and DHA intake on breastmilk PUFA level

|                                                         | LA        |          | GLA     |          | DGLA    |          | AA      |          | DTA     |          | ALA     |          | EPA     |          | DHA     |          |
|---------------------------------------------------------|-----------|----------|---------|----------|---------|----------|---------|----------|---------|----------|---------|----------|---------|----------|---------|----------|
|                                                         | coef      | <i>P</i> | coef    | <i>P</i> | coef    | <i>P</i> | coef    | <i>P</i> | coef    | <i>P</i> | coef    | <i>P</i> | coef    | <i>P</i> | coef    | <i>P</i> |
| Q <sub>1</sub> <sup>a</sup>                             | Reference |          |         |          |         |          |         |          |         |          |         |          |         |          |         |          |
| Q <sub>2</sub> <sup>a</sup>                             | -0.0243   | 0.644    | -0.0161 | 0.344    | -0.0047 | 0.567    | -0.0053 | 0.635    | -0.0012 | 0.654    | -0.0099 | 0.643    | -0.0084 | 0.333    | -0.0031 | 0.876    |
| Q <sub>3</sub> <sup>a</sup>                             | -0.0102   | 0.857    | -0.0091 | 0.615    | 0.0019  | 0.832    | -0.0033 | 0.786    | 0.0000  | 0.988    | -0.0239 | 0.295    | -0.0164 | 0.076    | -0.0120 | 0.57     |
| Q <sub>4</sub> <sup>a</sup>                             | -0.0432   | 0.446    | 0.0047  | 0.799    | -0.0074 | 0.403    | -0.0098 | 0.421    | -0.0021 | 0.485    | -0.0055 | 0.81     | 0.0036  | 0.7      | 0.0095  | 0.654    |
| H <sub>1</sub> <sup>b</sup>                             | Reference |          |         |          |         |          |         |          |         |          |         |          |         |          |         |          |
| H <sub>2</sub> <sup>b</sup>                             | -0.0723   | 0.046    | -0.0205 | 0.093    | -0.0065 | 0.253    | -0.0125 | 0.107    | -0.0022 | 0.251    | -0.0253 | 0.083    | -0.0143 | 0.022    | -0.0364 | 0.008    |
| H <sub>3</sub> <sup>b</sup>                             | -0.0238   | 0.587    | 0.0013  | 0.929    | -0.0074 | 0.292    | -0.0088 | 0.357    | -0.0023 | 0.345    | -0.0086 | 0.63     | -0.0097 | 0.194    | -0.0004 | 0.978    |
| H <sub>4</sub> <sup>b</sup>                             | -0.0758   | 0.101    | -0.0049 | 0.743    | -0.0085 | 0.24     | -0.0057 | 0.563    | -0.0007 | 0.761    | -0.0259 | 0.163    | -0.0051 | 0.501    | -0.0135 | 0.438    |
| Q <sub>1</sub> -H <sub>1</sub> <sup>c</sup>             | Reference |          |         |          |         |          |         |          |         |          |         |          |         |          |         |          |
| Q <sub>2</sub> -H <sub>2</sub> <sup>c</sup>             | 0.1107    | 0.038    | 0.0329  | 0.060    | 0.0108  | 0.192    | 0.0255  | 0.025    | 0.0040  | 0.143    | 0.0385  | 0.072    | 0.0190  | 0.034    | 0.0586  | 0.004    |
| Q <sub>3</sub> -H <sub>2</sub> <sup>c</sup>             | 0.0324    | 0.530    | 0.0164  | 0.332    | 0.0010  | 0.898    | 0.0076  | 0.492    | 0.0006  | 0.813    | 0.0298  | 0.151    | 0.0129  | 0.136    | 0.0338  | 0.082    |
| Q <sub>4</sub> -H <sub>2</sub> <sup>c</sup>             | 0.0705    | 0.165    | 0.0108  | 0.516    | 0.0066  | 0.402    | 0.0150  | 0.167    | 0.0021  | 0.432    | 0.0177  | 0.384    | 0.0060  | 0.482    | 0.0274  | 0.15     |
| Q <sub>2</sub> -H <sub>3</sub> <sup>c</sup>             | -0.0187   | 0.742    | -0.0006 | 0.974    | 0.0048  | 0.591    | 0.0046  | 0.709    | 0.0020  | 0.503    | -0.0183 | 0.428    | 0.0044  | 0.647    | -0.0174 | 0.417    |
| Q <sub>3</sub> <sup>a</sup> H <sub>3</sub> <sup>c</sup> | 0.0474    | 0.394    | 0.0029  | 0.870    | 0.0027  | 0.759    | 0.0194  | 0.106    | 0.0049  | 0.094    | 0.0241  | 0.285    | 0.0152  | 0.1      | 0.0099  | 0.631    |

|                                             |        |       |         |       |        |       |         |       |         |       |        |       |         |       |         |       |
|---------------------------------------------|--------|-------|---------|-------|--------|-------|---------|-------|---------|-------|--------|-------|---------|-------|---------|-------|
| Q <sub>4</sub> -H <sub>3</sub> <sup>c</sup> | 0.0198 | 0.741 | -0.0149 | 0.442 | 0.0066 | 0.489 | 0.0108  | 0.403 | 0.0018  | 0.557 | 0.0072 | 0.765 | -0.0004 | 0.967 | -0.0171 | 0.448 |
| Q <sub>2</sub> -H <sub>4</sub> <sup>c</sup> | 0.0477 | 0.512 | 0.0131  | 0.567 | 0.0096 | 0.403 | 0.0068  | 0.662 | 0.0004  | 0.919 | 0.0367 | 0.224 | -0.0061 | 0.6   | -0.0028 | 0.915 |
| Q <sub>3</sub> -H <sub>4</sub> <sup>c</sup> | 0.0709 | 0.278 | 0.0064  | 0.757 | 0.0052 | 0.608 | 0.0074  | 0.591 | -0.0013 | 0.707 | 0.0294 | 0.27  | 0.0101  | 0.343 | 0.0177  | 0.467 |
| Q <sub>4</sub> -H <sub>4</sub> <sup>c</sup> | 0.0546 | 0.413 | -0.0197 | 0.359 | 0.0035 | 0.734 | -0.0045 | 0.755 | -0.0019 | 0.591 | 0.0144 | 0.59  | -0.0057 | 0.606 | -0.0026 | 0.918 |

*ELOVL2*, elongase gene 2 of the very long chain fatty acid; PUFA, long chain polyunsaturated fatty acids; LA, linoleic acid; GLA,  $\gamma$ -linolenic acid; DGLA, dihomogamma-linolenic acid; ARA, arachidonic acid; DTA, docosatetraenoic acid; ALA,  $\alpha$ -linolenic acid; EPA, eicosapentaenoic acid; DHA, docosahexaenoic acid.

<sup>a</sup> Q means the quartile level of DHA intake: Q<sub>1</sub>: <14.58 mg/day (reference); Q<sub>2</sub>: 14.58–43.15 mg/day; Q<sub>3</sub>: 43.16–118.82 mg/day; Q<sub>4</sub>:  $\geq$ 118.82 mg/day.

<sup>b</sup> H means the type of haplotype in *ELOVL2*; H<sub>1</sub>: A-C-C (reference); H<sub>2</sub>: A-G-G, H<sub>3</sub>: G-C-C, H<sub>4</sub>: A-C-G; Haplotypes are named according to its frequency.

<sup>c</sup> Q-H means the effect of interaction between DHA intake and haplotype on PUFA levels compared with reference.
