# Supplementary material
Source: PubMed Central journal article supplement (PMC6495163)
Supplement: 10.1194_M090951_jlr.M090951-5.pdf [file 10.1194_M090951_jlr.M090951-5.pdf]

**supplemental Table S5:** Interaction between *ELOVL5* haplotype and DHA intake on breastmilk PUFA level

|                                             | LA        |          | GLA     |          | DGLA    |          | AA      |          | DTA     |          | ALA     |          | EPA     |          | DHA     |          |
|---------------------------------------------|-----------|----------|---------|----------|---------|----------|---------|----------|---------|----------|---------|----------|---------|----------|---------|----------|
|                                             | coef      | <i>P</i> | coef    | <i>P</i> | coef    | <i>P</i> | coef    | <i>P</i> | coef    | <i>P</i> | coef    | <i>P</i> | coef    | <i>P</i> | coef    | <i>P</i> |
| Q <sub>1</sub> <sup>a</sup>                 | Reference |          |         |          |         |          |         |          |         |          |         |          |         |          |         |          |
| Q <sub>2</sub> <sup>a</sup>                 | -0.0144   | 0.790    | -0.0144 | 0.406    | -0.0023 | 0.78     | 0.0005  | 0.967    | -0.0004 | 0.891    | -0.0327 | 0.128    | -0.0102 | 0.246    | -0.0193 | 0.342    |
| Q <sub>3</sub> <sup>a</sup>                 | 0.0394    | 0.461    | -0.0136 | 0.429    | 0.0067  | 0.408    | 0.0143  | 0.207    | 0.0022  | 0.42     | -0.0012 | 0.954    | -0.0109 | 0.210    | 0.0222  | 0.27     |
| Q <sub>4</sub> <sup>a</sup>                 | -0.0450   | 0.374    | -0.0126 | 0.437    | -0.0072 | 0.345    | -0.0136 | 0.204    | -0.0024 | 0.351    | -0.0223 | 0.267    | -0.0020 | 0.812    | 0.0036  | 0.851    |
| H <sub>1</sub> <sup>b</sup>                 | Reference |          |         |          |         |          |         |          |         |          |         |          |         |          |         |          |
| H <sub>2</sub> <sup>b</sup>                 | 0.0102    | 0.756    | -0.0025 | 0.816    | 0.0065  | 0.194    | 0.0052  | 0.456    | 0.0022  | 0.183    | -0.0051 | 0.697    | -0.0043 | 0.422    | 0.0035  | 0.782    |
| H <sub>3</sub> <sup>b</sup>                 | -0.0086   | 0.886    | 0.0081  | 0.672    | 0.0031  | 0.736    | -0.0043 | 0.735    | -0.0011 | 0.721    | -0.0034 | 0.886    | -0.0106 | 0.273    | -0.0172 | 0.473    |
| H <sub>4</sub> <sup>b</sup>                 | -0.0496   | 0.424    | -0.0283 | 0.154    | -0.0039 | 0.684    | -0.0118 | 0.369    | -0.0009 | 0.785    | -0.0318 | 0.198    | -0.0095 | 0.341    | -0.0161 | 0.484    |
| H <sub>5</sub> <sup>b</sup>                 | -0.0546   | 0.376    | -0.0280 | 0.157    | -0.0098 | 0.295    | -0.0145 | 0.264    | -0.0040 | 0.205    | -0.0131 | 0.595    | -0.0168 | 0.095    | -0.0329 | 0.157    |
| Q <sub>1</sub> -H <sub>1</sub> <sup>c</sup> | Reference |          |         |          |         |          |         |          |         |          |         |          |         |          |         |          |
| Q <sub>2</sub> -H <sub>2</sub> <sup>c</sup> | 0.0215    | 0.649    | 0.0109  | 0.471    | 0.0008  | 0.909    | 0.0004  | 0.971    | -0.0001 | 0.972    | 0.0294  | 0.117    | 0.0055  | 0.472    | 0.0221  | 0.214    |
| Q <sub>3</sub> -H <sub>2</sub> <sup>c</sup> | -0.0107   | 0.821    | 0.0097  | 0.52     | -0.0056 | 0.437    | -0.0069 | 0.49     | -0.0011 | 0.637    | 0.0119  | 0.526    | 0.0074  | 0.337    | -0.0188 | 0.29     |
| Q <sub>4</sub> -H <sub>2</sub> <sup>c</sup> | 0.0024    | 0.958    | -0.0020 | 0.89     | -0.0014 | 0.837    | 0.0053  | 0.586    | -0.0007 | 0.763    | 0.0129  | 0.479    | -0.0041 | 0.582    | -0.0147 | 0.396    |
| Q <sub>2</sub> -H <sub>3</sub> <sup>c</sup> | 0.0239    | 0.762    | -0.0072 | 0.776    | 0.0015  | 0.899    | 0.0065  | 0.698    | 0.0021  | 0.601    | 0.0185  | 0.556    | 0.0061  | 0.63     | 0.0191  | 0.533    |

|                                             |         |       |        |       |         |       |         |       |         |       |         |       |        |       |         |       |
|---------------------------------------------|---------|-------|--------|-------|---------|-------|---------|-------|---------|-------|---------|-------|--------|-------|---------|-------|
| Q <sub>3</sub> -H <sub>3</sub> <sup>c</sup> | 0.0013  | 0.987 | 0.0029 | 0.909 | -0.0014 | 0.904 | -0.0041 | 0.805 | 0.0003  | 0.94  | -0.0010 | 0.976 | 0.0150 | 0.239 | 0.0085  | 0.781 |
| Q <sub>4</sub> -H <sub>3</sub> <sup>c</sup> | 0.1416  | 0.071 | 0.0091 | 0.709 | 0.0123  | 0.298 | 0.0293  | 0.077 | 0.0055  | 0.164 | 0.0580  | 0.063 | 0.0157 | 0.225 | 0.0439  | 0.144 |
| Q <sub>2</sub> -H <sub>4</sub> <sup>c</sup> | 0.0341  | 0.699 | 0.0213 | 0.455 | 0.0030  | 0.829 | 0.0093  | 0.615 | 0.0003  | 0.953 | 0.0679  | 0.053 | 0.0072 | 0.611 | 0.0434  | 0.185 |
| Q <sub>3</sub> -H <sub>4</sub> <sup>c</sup> | -0.0251 | 0.778 | 0.0261 | 0.361 | -0.0146 | 0.281 | -0.0130 | 0.488 | -0.0029 | 0.527 | -0.0100 | 0.776 | 0.0062 | 0.663 | -0.0290 | 0.38  |
| Q <sub>4</sub> -H <sub>4</sub> <sup>c</sup> | 0.1994  | 0.068 | 0.0603 | 0.084 | 0.0385  | 0.020 | 0.0326  | 0.159 | 0.0046  | 0.409 | 0.0998  | 0.022 | 0.0359 | 0.042 | 0.0621  | 0.129 |
| Q <sub>2</sub> -H <sub>5</sub> <sup>c</sup> | 0.1158  | 0.238 | 0.0250 | 0.452 | 0.0318  | 0.036 | 0.0382  | 0.069 | 0.0083  | 0.099 | 0.0527  | 0.182 | 0.0424 | 0.011 | 0.0550  | 0.141 |
| Q <sub>3</sub> -H <sub>5</sub> <sup>c</sup> | 0.0526  | 0.651 | 0.0456 | 0.202 | 0.0149  | 0.383 | 0.0060  | 0.801 | 0.0020  | 0.73  | 0.0411  | 0.393 | 0.0056 | 0.756 | 0.0581  | 0.165 |
| Q <sub>4</sub> -H <sub>5</sub> <sup>c</sup> | -0.0068 | 0.944 | 0.0446 | 0.162 | 0.0059  | 0.694 | 0.0029  | 0.887 | 0.0020  | 0.695 | -0.0055 | 0.885 | 0.0393 | 0.015 | 0.0600  | 0.124 |

*ELOVL5*, elongase gene 5 of the very long chain fatty acid. PUFA, long chain polyunsaturated fatty acids; LA, linoleic acid; GLA,  $\gamma$ -linolenic acid; DGLA, dihomogamma-linolenic acid; ARA, arachidonic acid; DTA, docosatetraenoic acid; ALA,  $\alpha$ -linolenic acid; EPA, eicosapentaenoic acid; DHA, docosahexaenoic acid.

<sup>a</sup> Q means the quartile level of DHA intake: Q<sub>1</sub>: <14.58 mg/day (reference); Q<sub>2</sub>: 14.58–43.15 mg/day; Q<sub>3</sub>: 43.16–118.82 mg/day; Q<sub>4</sub>:  $\geq$ 118.82 mg/day.

<sup>b</sup> H means the type of haplotype in *ELOVL5*; H<sub>1</sub>: C-A-C-G-A (reference); H<sub>2</sub>: A-G-G-A-A; H<sub>3</sub>: C-A-C-A-T; H<sub>4</sub>: A-A-C-A-A; H<sub>5</sub>: C-A-C-A-A; Haplotypes are named according to its frequency.

<sup>c</sup> Q-H means the effect of interaction between DHA intake and haplotype on PUFA levels compared with reference.
